# Supplementary material for: Measuring similarities between gene expression profiles through new data transformations
Source: Springer Nature journal article supplement (doi:10.1186/1471-2105-8-29), 2007-01-27
Supplement: Additional file 5 [file 1471-2105-8-29-s5.pdf]

**Additional File 5.**

Let the expression of gene  $i$  at experiment  $t$ ,  $X_i(t)$ , follow a Normal distribution with mean  $\lambda(t)\theta_i$  and variance  $k\lambda(t)\theta_i$ , where  $k$  is a constant. We want to show that the  $\hat{\theta}_i$  in (2) is an unbiased estimator of  $\theta_i$  and  $\hat{\lambda}(t)$  in (2) is a consistent estimator of  $\lambda(t)$  under this normal model. By (2),  $\hat{\theta}_i$  and  $\hat{\lambda}(t)$  can be computed by

$$\hat{\theta}_i = \sum_{t=1}^T X_i(t), \quad \hat{\lambda}(t) = \frac{\sum_{i=1}^n X_i(t)}{\sum_{i=1}^n \sum_{t=1}^T X_i(t)}. \quad (\text{S4})$$

**Statement 1.**  $\hat{\theta}_i$  is unbiased.

**Proof:**  $E(\hat{\theta}_i) = \sum_{t=1}^T E(X_i(t)) = \sum_{t=1}^T (\lambda(t)\theta_i) = \theta_i \sum_{t=1}^T \lambda(t) = \theta_i$ . So  $\hat{\theta}_i$  is an unbiased estimator of  $\theta_i$ . ■

**Statement 2.**  $\hat{\lambda}(t)$  is a consistent estimator of  $\lambda(t)$ .

**Proof:** For  $\hat{\lambda}(t)$  to be a consistent estimator of  $\lambda(t)$ , it is sufficient to show that  $\hat{\lambda}(t) - \lambda(t)$  converges to 0 in probability. By (S4), we have

$$\hat{\lambda}(t) - \lambda(t) = \frac{\sum_{i=1}^n X_i(t) - \lambda(t) \sum_{i=1}^n \sum_{j=1}^T X_i(j)}{\sum_{i=1}^n \sum_{j=1}^T X_i(j)} = \frac{\frac{1}{n} \left[ \sum_{i=1}^n X_i(t) - \lambda(t) \sum_{i=1}^n \sum_{j=1}^T X_i(j) \right]}{\frac{1}{n} \sum_{i=1}^n \sum_{j=1}^T X_i(j)}. \quad (\text{S5})$$

We first consider the numerator ( $M_n$ ) of (S5).

$$\begin{aligned} E(M_n) &= \frac{1}{n} \sum_{i=1}^n \left[ \lambda(t)\theta_i - \lambda(t) \left( \sum_{j=1}^T \lambda(j)\theta_i \right) \right] \\ &= \frac{1}{n} \sum_{i=1}^n [\lambda(t)\theta_i - \lambda(t)\theta_i] \\ &= 0 \end{aligned}$$

and

$$\begin{aligned}
\text{Var}(M_n) &= \frac{1}{n^2} \sum_{i=1}^n \left[ (1-\lambda(t))^2 k\lambda(t)\theta_i + \lambda(t)^2 \left( \sum_{j \neq i}^T k\lambda(j)\theta_i \right) \right] \\
&= \frac{1}{n^2} \sum_{i=1}^n \left[ (1-\lambda(t))^2 k\lambda(t)\theta_i + k\lambda(t)^2 (1-\lambda(t))\theta_i \right] \\
&= \frac{1}{n^2} \sum_{i=1}^n \left[ k(1-\lambda(t))\lambda(t)\theta_i \right] \\
&= \frac{k(1-\lambda(t))\lambda(t)\theta_i}{n}
\end{aligned}$$

So the numerator  $M_n$  converges to 0 in probability as  $n$  goes to infinity. Now we consider the denominator ( $D_n$ ) in (S5). It is reasonable to assume that  $\theta_i$ 's are uniformly bounded. That is that there exists a positive real value  $A$  and  $B$ , such that  $A \leq |\theta_i| \leq B$  for any  $i$ . Then we have

$$0 < A \leq E(D_n) = \frac{\sum_{i=1}^n \theta_i}{n} \leq B, \quad \text{Var}(D_n) = \frac{\sum_{i=1}^n k\theta_i}{n^2} \leq \frac{kB}{n} \quad \text{and} \quad \lim_{n \rightarrow \infty} \text{Var}(D_n) = 0.$$

Consequently, for any  $\varepsilon > 0$ , we have

$$\begin{aligned}
\lim_{n \rightarrow \infty} P\left(\left|\frac{M_n}{D_n}\right| > \varepsilon\right) &= \lim_{n \rightarrow \infty} \left( P\left(\left|\frac{M_n}{D_n}\right| > \varepsilon, |D_n - E(D_n)| > \frac{A}{2}\right) + P\left(\left|\frac{M_n}{D_n}\right| > \varepsilon, |D_n - E(D_n)| \leq \frac{A}{2}\right) \right) \\
&\leq \lim_{n \rightarrow \infty} \left( P\left(|D_n - E(D_n)| > \frac{A}{2}\right) + P\left(\left|\frac{M_n}{A/2}\right| > \varepsilon, |D_n - E(D_n)| \leq \frac{A}{2}\right) \right) \\
&\leq \lim_{n \rightarrow \infty} \left( \frac{\text{Var}(D_n)}{(A/2)^2} + P\left(|M_n| > \frac{A\varepsilon}{2}\right) \right) \\
&= \lim_{n \rightarrow \infty} \frac{\text{Var}(D_n)}{(A/2)^2} + \lim_{n \rightarrow \infty} P\left(|M_n| > \frac{A\varepsilon}{2}\right) \\
&= 0
\end{aligned}$$

So  $\hat{\lambda}(t) - \lambda(t) = \frac{M_n}{D_n}$  converges to 0 in probability as  $n$  goes to infinity, and then  $\hat{\lambda}(t)$  is a consistent estimator of  $\lambda(t)$ . ■
